# Supplementary material
Source: Research Square preprint supplement (doi:10.21203/rs.3.rs-9025261/v1)
Supplement: Supplementary file 1 [file f267a0ac4d5f4617612c2407.docx]

**Content**

**[Table S1 Full names of brain regions corresponding to abbreviations used 2](#_Toc32463)**

**[Table S2 Brain regions showing abnormal gray matter volume in BN patients compared with HCs in the whole-brain VBM analysis 4](#_Toc29452)**

**[Table S3 Brain regions showing abnormal cortical morphology in BN patients compared with HCs in the whole-brain SBM analysis 5](#_Toc15639)**

**[Table S4 Mediation of PHQ-9 and GAD-7 on the association between GMV of cluster 1 and eating disorder severity 6](#_Toc15969)**

# **Table S1 Full names of brain regions corresponding to abbreviations used**

| **Abbreviations** | **Full nane** |
| --- | --- |
| Cerebelum_Crus2_L | Left Cerebellum Crus II |
| Cerebelum_Crus1_L | Left Cerebellum Crus I |
| Cerebelum_6_L | Left Cerebellum Lobule VI |
| Cerebelum_7b_L | Left Cerebellum Lobule VIIb |
| Cerebelum_8_L | Left Cerebellum Lobule VIII |
| Cerebelum_Crus2_R | Right Cerebellum Crus II |
| Cerebelum_Crus1_R | Right Cerebellum Crus I |
| Cerebelum_7b_R | Right Cerebellum Lobule VIIb |
| Cerebelum_8_R | Right Cerebellum Lobule VIII |
| Lingual_R | Right Lingual Gyrus |
| Calcarine_R | Right Calcarine Cortex |
| Lingual_L | Left Lingual Gyrus |
| Calcarine_L | Left Calcarine Cortex |
| Precuneus_R | Right Precuneus |
| Cerebelum_3_R | Right Cerebellum Lobule III |
| Cerebelum_4_5_R | Right Cerebellum Lobule IV–V |
| Precuneus_L | Left Precuneus |
| Vermis_4_5 | Vermis Lobule IV–V |
| Cerebelum_4_5_L | Left Cerebellum Lobule IV–V |
| Vermis_3 | Vermis Lobule III |
| ParaHippocampal_R | Right Parahippocampal Gyrus |
| Vermis_6 | Vermis Lobule VI |
| Vermis_1_2 | Vermis Lobule I–II |
| ParaHippocampal_L | Left Parahippocampal Gyrus |
| Temporal_Sup_R | Right Superior Temporal Gyrus |
| Heschl_R | Right Heschl Gyrus |
| Rolandic_Oper_R | Right Rolandic Operculum |
| Insula_R | Right Insula |
| Temporal_Mid_R | Right Middle Temporal Gyrus |

# **Table S2 Brain regions showing abnormal gray matter volume in BN patients compared with HCs in the whole-brain VBM analysis**

| **Cluster. No** | **Direction** | **Number of voxels** | **Peak MNI** | | | | **Peak intensity** | **cluster breakdown (no. of voxels)** | ***PFWE*** |
| --- | --- | --- | --- | --- | --- | --- | --- | --- | --- |
|  |  |  | **region** | **X** | **Y** | **Z** |  |  |  |
| Cluster 1 | BN < HC | 1864 | Cerebelum_6_L | -34 | -50 | -36 | 4.377 | Cerebelum_Crus2_L (800); Cerebelum_Crus1_L (610); Cerebelum_6_L (377); Cerebelum_7b_L (56); Cerebelum_8_L（10） | 0.003** |
| Cluster 2 | BN < HC | 943 | Cerebelum_Crus1_R | 24 | -76 | -34 | 4.001 | Cerebelum_Crus2_R (485); Cerebelum_Crus1_R (430); Cerebelum_7b_R (15); Cerebelum_8_R (13) | 0.033* |
| Cluster 3 | BN < HC | 3381 | Precuneus_R | 24 | -48 | 0 | 4.710 | Lingual_R (641); Calcarine_R (617); Lingual_L (444); Calcarine_L (373); Cerebelum_6_L (247); Precuneus_R (204); Cerebelum_3_R (151); Cerebelum_4_5_R (150); Precuneus_L (131); Vermis_4_5 (86); Cerebelum_4_5_L (69); Vermis_3 (57); ParaHippocampal_R (31); Vermis_6 (21); Vermis_1_2 (3); ParaHippocampal_L (2) | <0.001*** |
| Cluster 4 | BN < HC | 882 | Temporal_Sup_R | 51 | -12 | -2 | 4.191 | Temporal_Sup_R (544); Heschl_R (122); Rolandic_Oper_R (102); Insula_R (65); Temporal_Mid_R (4) | 0.041* |

**Notes:** Statistical analyses of VBM were performed based on a whole-brain level (voxel-wise uncorrected p < 0.001 and cluster-wise p < 0.05, family-wise error corrected). **Abbreviations:** BN, bulimia nervosa; HCs, Health controls; VBM, voxel-based morphometry; MNI, Montreal Neurological Institute; L, left; R, right.*indicated *P* < 0.05; **indicated *P*   <  0.01; ***indicated *P*  <  0.001.

###

# **Table S3 Brain regions showing abnormal cortical morphology in BN patients compared with HCs in the whole-brain SBM analysis**

| **Cortical morphometry** | **Cluster location** | **Direction** | **MNI coordinates (peak vertex)** | | | **Size (mm2)** | ***CWP*** |
| --- | --- | --- | --- | --- | --- | --- | --- |
| **x** | **y** | **z** |
| CV | R Lingual | BN < HC | 21.4 | -60.2 | 0.3 | 278.07 | < 0.001*** |
| SA | None |  |  |  |  |  |  |
| CT | None |  |  |  |  |  |  |

**Notes:** Statistical analyses of CV, CT and SA were performed based on a whole-brain level (vertex-wise p < 0.001 and cluster-wise p < 0.05, Monte-Carlo simulations corrected). **Abbreviations:** BN, bulimia nervosa; HCs, Health controls; SBM, surface-based morphometry; MNI, Montreal Neurological Institute; CV, cortical volume; SA, surface area; CT, cortical thickness; L, left; R, right; *CWP*, cluster-wise probability.*indicated *P* < 0.05; **indicated *P*   <  0.01; ***indicated *P*  <  0.001.

# **Table S4 Mediation of PHQ-9 and GAD-7 on the association between GMV of cluster 1 and eating disorder severity**

| **Mediator** | **Effect** | **From** | **To** | **B (unstd.)** | **SE** | **95% CI** | **β (std.all)** | ***P*** |
| --- | --- | --- | --- | --- | --- | --- | --- | --- |
| **PHQ-9** | a | cluster1 | PHQ-9 | -52.40 | 19.00 | [-86.94, -12.00] | -0.40 | 0.006** |
| b | PHQ-9 | EDI | 2.32 | 0.52 | [ 1.28, 3.31] | 0.55 | <0.001*** |
| c′ | cluster1 | EDI | 63.45 | 70.03 | [-70.20, 202.09] | 0.12 | 0.365 |
| ab | cluster1 | EDI | -121.46 | 46.84 | [-212.06, -26.07] | -0.22 | 0.010* |
| total | cluster1 | EDI | -58.01 | 83.509 | [-213.37, 118.05] | -0.11 | 0.487 |
| **GAD-7** | a | cluster1 | GAD-7 | -57.62 | 16.60 | [-87.82, -21.68] | -0.48 | 0.001** |
| b | GAD-7 | EDI | 2.32 | 0.64 | [ 0.94, 3.49] | 0.51 | <0.001*** |
| c′ | cluster1 | EDI | 75.70 | 80.61 | [-69.78, 242.47] | 0.14 | 0.348 |
| ab | cluster1 | EDI | -133.71 | 58.94 | [-263.61, -32.94] | -0.24 | 0.023* |
| total | cluster1 | EDI | -58.01 | 84.67 | [-212.47, 115.87] | -0.11 | 0.493 |
| **PHQ-9 + GAD-7** | a1 | cluster1 | PHQ-9 | -52.40 | 18.85 | [-86.36, -12.96] | -0.40 | 0.005** |
| b1 | PHQ-9 | EDI | 1.85 | 0.77 | [0.22, 3.31] | 0.44 | 0.017* |
| a2 | cluster1 | GAD-7 | -57.63 | 16.42 | [-86.76, -22.35] | -0.48 | <0.001*** |
| b2 | GAD-7 | EDI | 0.80 | 0.88 | [-0.82, 2.61] | 0.17 | 0.37 |
| c’ | cluster1 | EDI | 84.52 | 72.00 | [-46.54, 234.34] | 0.15 | 0.24 |
| a1b1 | cluster1 | EDI | -96.74 | 50.18 | [-197.93, -1.59] | -0.18 | 0.054 |
| a2b2 | cluster1 | EDI | -45.79 | 59.28 | [ -189.52, 42.56] | -0.08 | 0.440 |
| a1b1 + a1b1 | cluster1 | EDI | -142.53 | 56.85 | [-256.63, -36.72] | -0.26 | 0.012* |
| total | cluster1 | EDI | -58.01 | 84.16 | [-214.85, 115.35] | -0.11 | 0.491 |

**Note**: All paths are adjusted for age, education, BMI, and total intracranial volume. Indirect effects were estimated using non-parametric bootstrapping (5,000 samples; bias-corrected and accelerated 95% CIs)；a, the effect of the independent variable on the mediator variable. b, the effect of the mediator on the dependent variable. c’, the effect of the independent variable on the dependent variable. a*b, the indirect effect. **Abbreviations**: GMV, gray matter volume; PHQ-9, Patient Health Questionnaire-9; GAD-7, Generalized Anxiety Disorder-7; EDI, Eating Disorder Inventory; BMI, body mass index. **P* < 0.05; ***P* < 0.01; ****P* < 0.001
